# Supplementary material
Source: publisher figshare collection journal article supplement (https://plos.figshare.com/articles/dataset/_/1584262)
Supplement: Supplementary file [file 1]

---

| $R^2$               |                 |                 |                     |                     |
|---------------------|-----------------|-----------------|---------------------|---------------------|
|                     | $Q_{20}$        | $Q_{60}$        | $V_{60}$            | CATH                |
| $\langle z \rangle$ | $0.09 \pm 0.05$ | $0.14 \pm 0.08$ | $0.064 \pm 0.011$   | $0.21 \pm 0.02$     |
| $CO$                | $0.11 \pm 0.05$ | $0.34 \pm 0.10$ | $0.119 \pm 0.014$   | $0.021 \pm 0.007$   |
| $SS$                | $0.02 \pm 0.02$ | $0.03 \pm 0.03$ | $0.0014 \pm 0.0014$ | $0.0007 \pm 0.0004$ |
| $\alpha$            | $0.04 \pm 0.03$ | $0.11 \pm 0.07$ | $0.19 \pm 0.02$     | $0.096 \pm 0.014$   |
| $\beta$             | $0.04 \pm 0.03$ | $0.27 \pm 0.09$ | $0.17 \pm 0.02$     | $0.17 \pm 0.02$     |
| $\tau$              | $0.12 \pm 0.05$ | $0.23 \pm 0.09$ | $0.106 \pm 0.014$   | $0.006 \pm 0.004$   |

| Slope               |                          |                         |                            |                           |
|---------------------|--------------------------|-------------------------|----------------------------|---------------------------|
|                     | $Q_{20}$                 | $Q_{60}$                | $V_{60}$                   | CATH                      |
| $\langle z \rangle$ | $0.17 \pm 0.03$ (0.000)  | $0.27 \pm 0.05$ (0.000) | $-0.373 \pm 0.017$ (0.000) | $0.425 \pm 0.011$ (0.000) |
| $CO$                | $1.19 \pm 0.16$ (0.000)  | $3.8 \pm 0.3$ (0.000)   | $2.7 \pm 0.2$ (0.000)      | $1.48 \pm 0.13$ (0.000)   |
| $SS$                | $-0.27 \pm 0.09$ (0.003) | $0.4 \pm 0.6$ (0.080)   | $-0.18 \pm 0.07$ (0.013)   | $0.05 \pm 0.09$ (0.530)   |
| $\alpha$            | $-0.41 \pm 0.11$ (0.000) | $-1.2 \pm 0.2$ (0.000)  | $-1.60 \pm 0.04$ (0.000)   | $-1.12 \pm 0.04$ (0.000)  |
| $\beta$             | $0.30 \pm 0.07$ (0.000)  | $1.46 \pm 0.16$ (0.000) | $1.22 \pm 0.03$ (0.000)    | $2.10 \pm 0.06$ (0.000)   |
| $\tau$              | $-0.95 \pm 0.12$ (0.000) | $-2.8 \pm 0.3$ (0.000)  | $-3.64 \pm 0.13$ (0.000)   | $1.2 \pm 0.2$ (0.000)     |
